# Supplementary material for: Stem cells repurpose proliferation to contain a breach in their niche barrier
Source: eLife journal article supplement (doi:10.7554/elife.41661), 2018-12-06

# Figure supplement 1

## A FACS Strategy to Purify WT Telogen HFSCs for ELISA

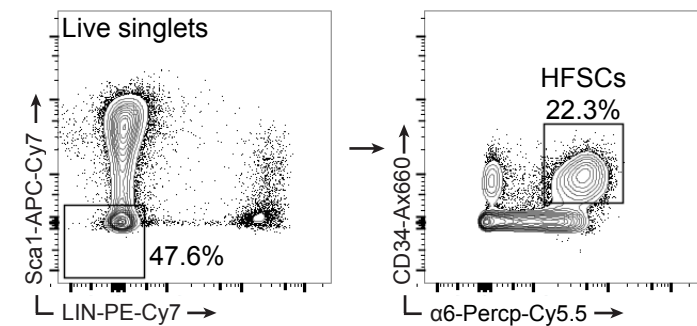

## B Cadherin Expression in HFSCs (ELISA)

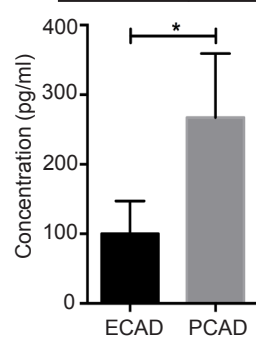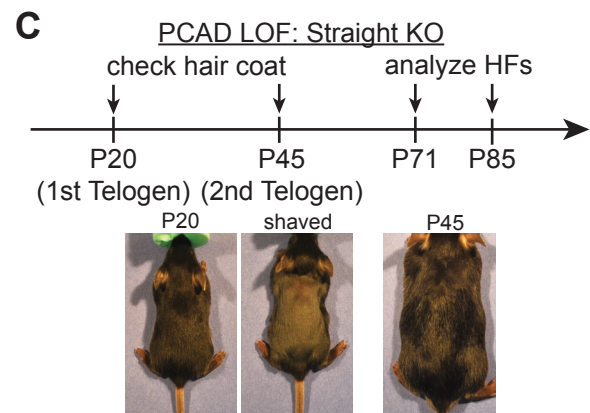

## D

*Cdh3*-KO HFs in 2nd Telogen

Early Anagen

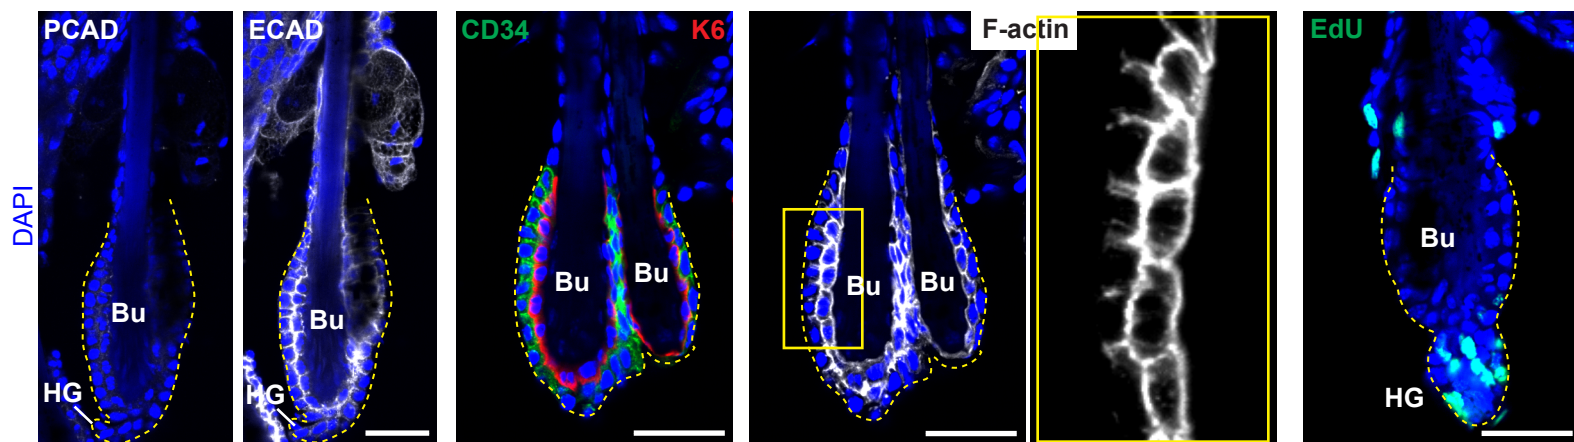

Supplement: supp [file elife_poa_e41661_Figure_1_figure_supplement_1.pdf › elife_poa_e41661_Figure_1_figure_supplement_1.pdf]
