# Supplementary material for: Stem cells repurpose proliferation to contain a breach in their niche barrier
Source: eLife journal article supplement (doi:10.7554/elife.41661), 2018-12-06

# Figure supplement 4

## A Expression of HFSC Genes in Hyperthickend Bulge

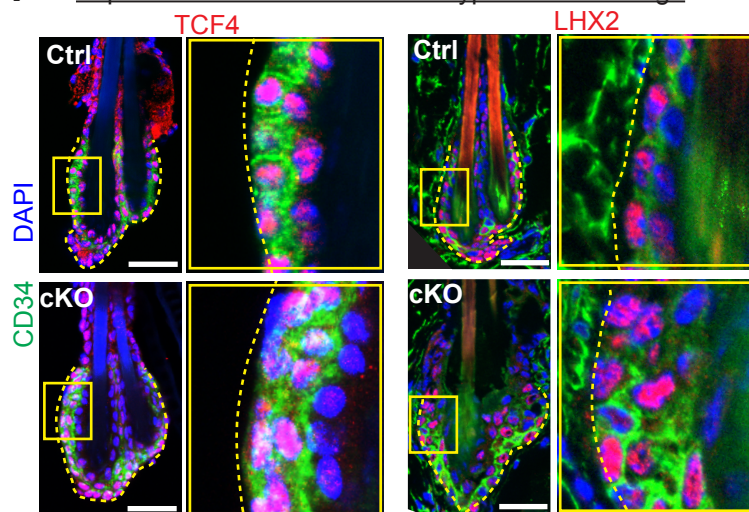

## B cKO HFs

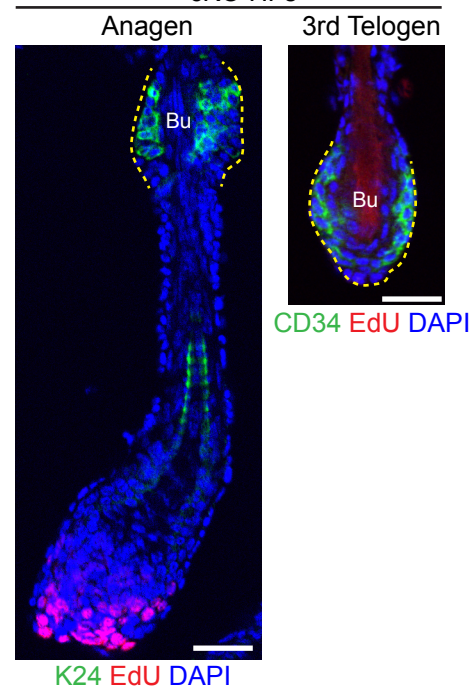

## C PCAD Overexpression Strategy

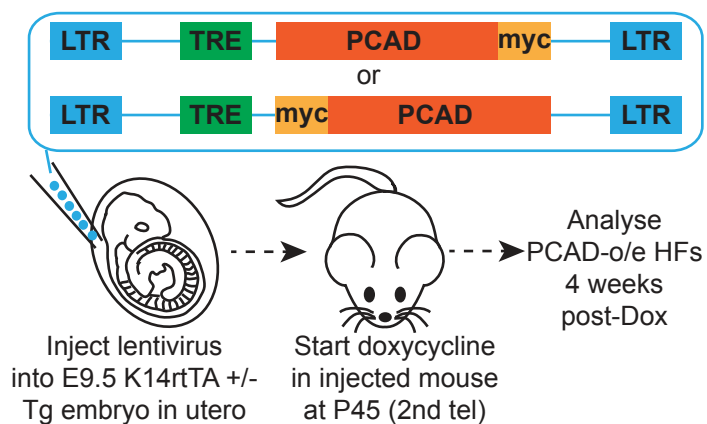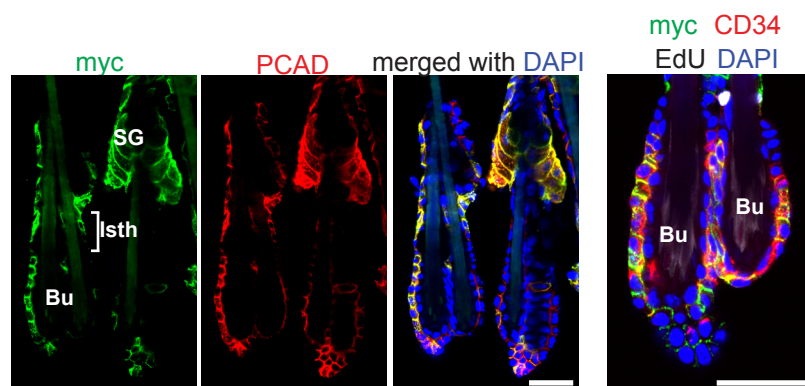

## D ECAD-LOF in Stem Cells: *K15CrePGR; Cdh1 fl/fl; R26-YFP*

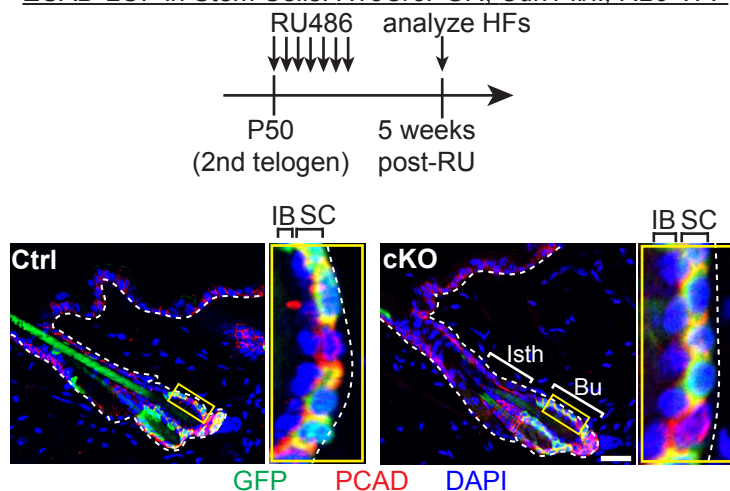

## E ECAD LOF in Inner Bulge: *Sox9CreER; Cdh1 fl/fl; R26-YFP*

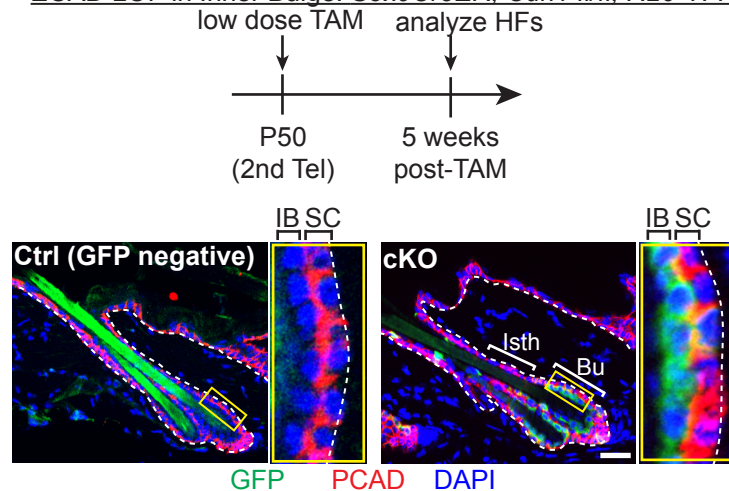

Supplement: supp [file elife_poa_e41661_Figure_2_figure_supplement_1.pdf › elife_poa_e41661_Figure_2_figure_supplement_1.pdf]
