# Supplementary material for: Stem cells repurpose proliferation to contain a breach in their niche barrier
Source: eLife journal article supplement (doi:10.7554/elife.41661), 2018-12-06

# Figure supplement 7

## A Expression of HFSC-Quiescence Factors in Inner Bulge

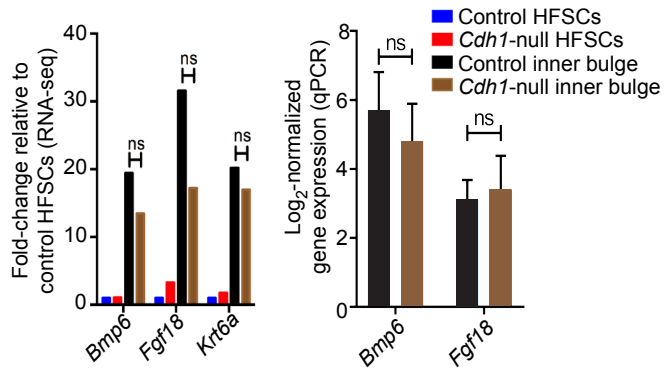

## Niche and Dex Effects on BMP targets in HFSCs

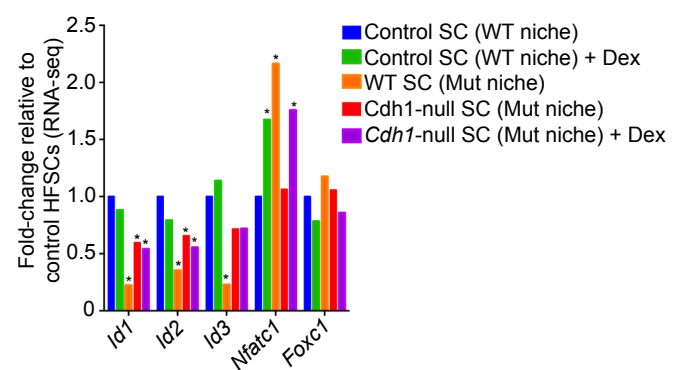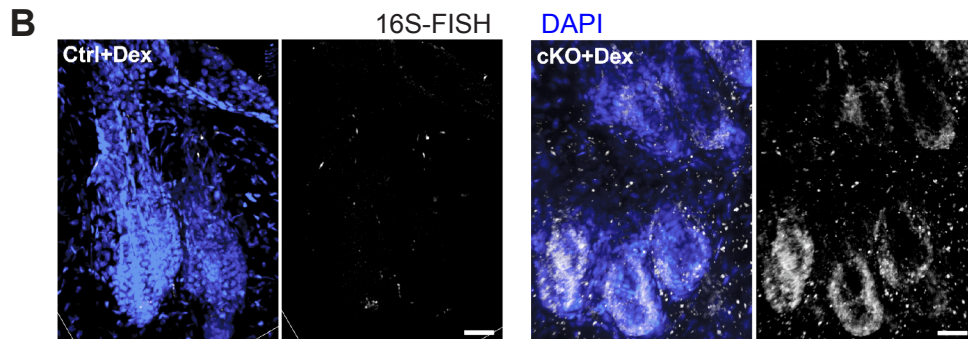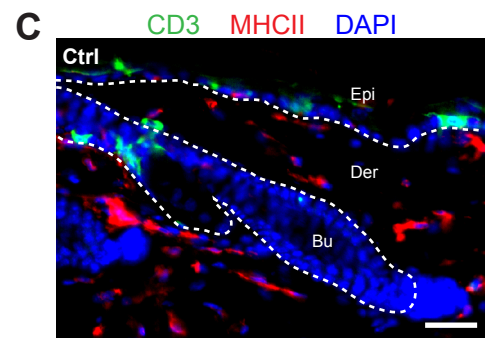

Supplement: supp [file elife_poa_e41661_Figure_6_figure_supplement_1.pdf › elife_poa_e41661_Figure_6_figure_supplement_1.pdf]
