# Supplementary material for: Stem cells repurpose proliferation to contain a breach in their niche barrier
Source: eLife journal article supplement (doi:10.7554/elife.41661), 2018-12-06
Supplement: supp [file elife_poa_e41661_Figure_6_figure_supplement_2.pdf › elife_poa_e41661_Figure_6_figure_supplement_2.pdf]

Figure supplement 8

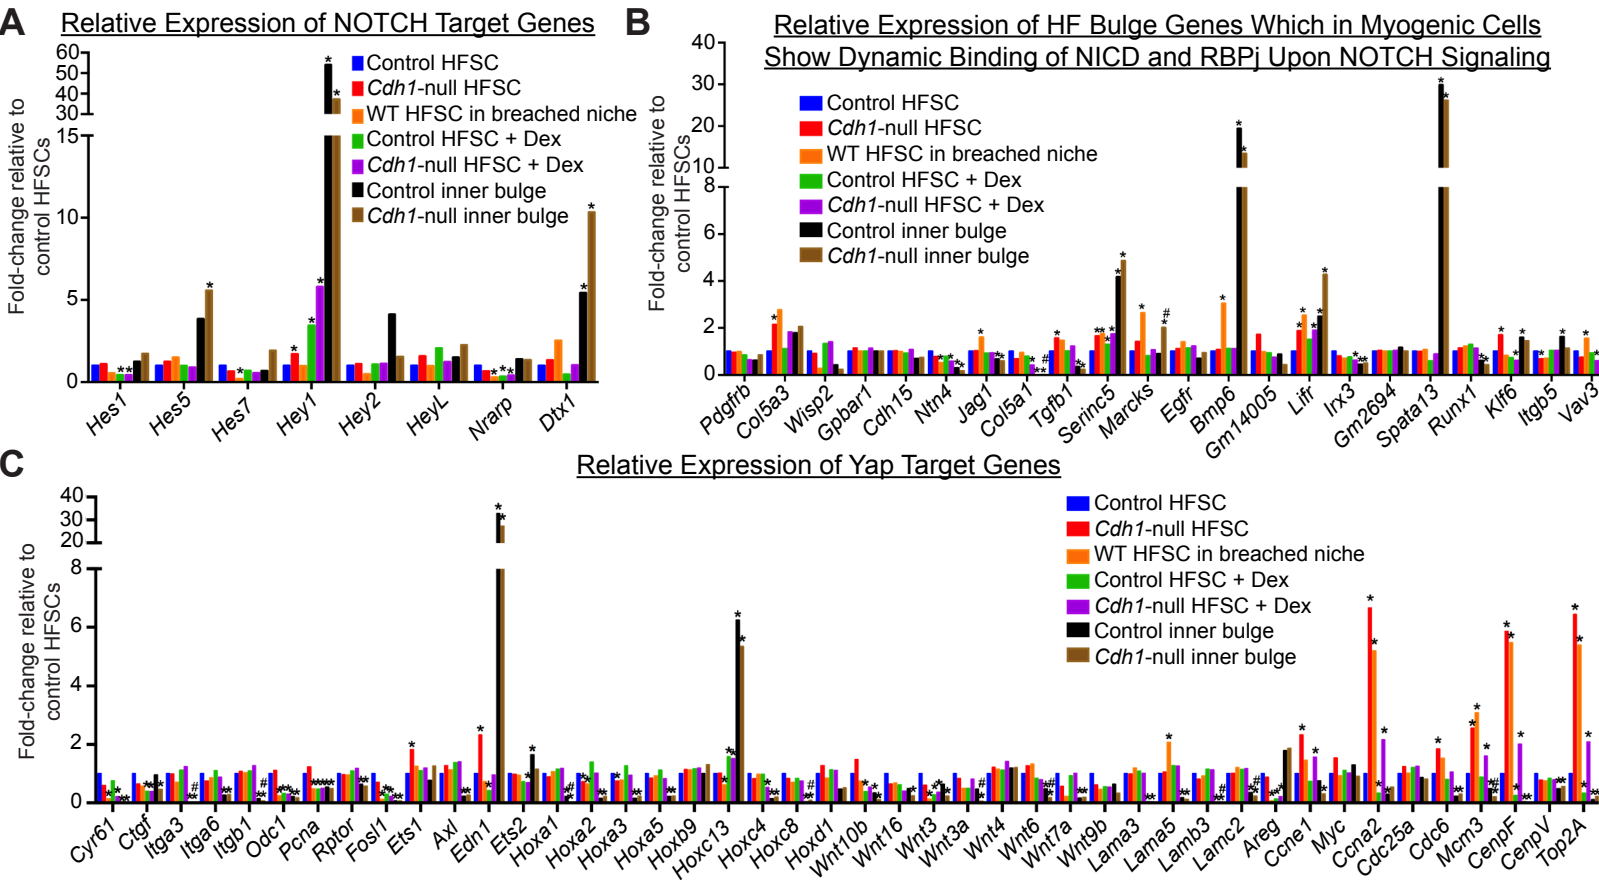

**D**

|                                | WT | PCAD-KO   | ECAD-<br>Sox9CreER-cKO<br>(regular TAM dose) | ECAD-<br>Sox9CreER-cKO<br>(low TAM dose) | ECAD-<br>K15CrePGR-cKO<br>(2nd telogen) | ECAD-<br>K15CrePGR-cKO<br>(4th telogen) |
|--------------------------------|----|-----------|----------------------------------------------|------------------------------------------|-----------------------------------------|-----------------------------------------|
| Cadherin<br>Expression Pattern |    |           |                                              |                                          |                                         |                                         |
| Targeted<br>Compartment        | -  | Entire HF | HFSC<br>Inner bulge                          | Inner bulge                              | HFSC                                    | HFSC<br>Inner bulge                     |
| Breached Barrier               | No | No        | Yes                                          | Yes                                      | No                                      | Yes                                     |
| Bulge Thickening               | No | No        | Yes                                          | Yes                                      | No                                      | Yes                                     |
| Immune Cell<br>Recruitment     | No | No        | Yes                                          | Yes                                      | No                                      | Yes                                     |
