# Supplementary figures and images for: Stem cells repurpose proliferation to contain a breach in their niche barrier
Source: eLife journal article supplement (doi:10.7554/elife.41661), 2018-12-06

# Figure supplement 2

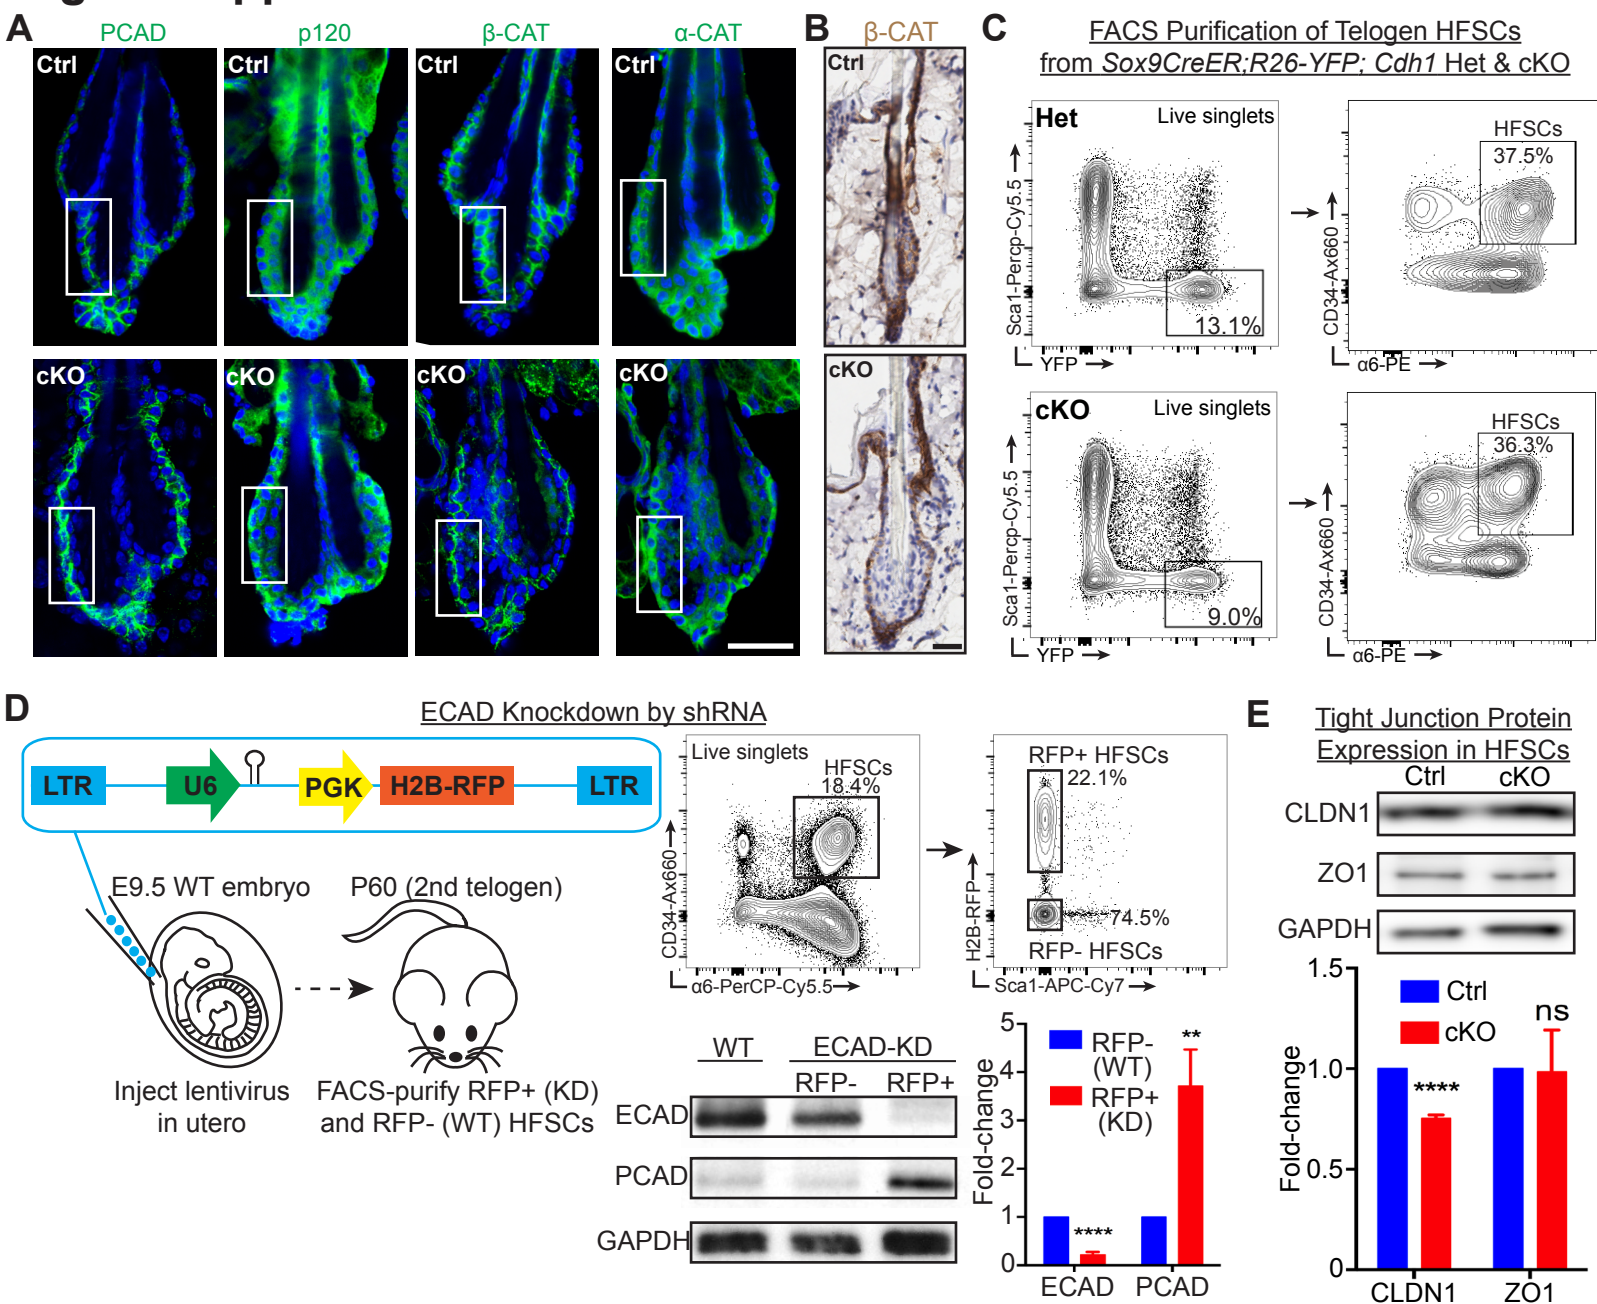

Supplement: supp [file elife_poa_e41661_Figure_1_figure_supplement_2.pdf › elife_poa_e41661_Figure_1_figure_supplement_2.pdf]

# Figure supplement 3

A

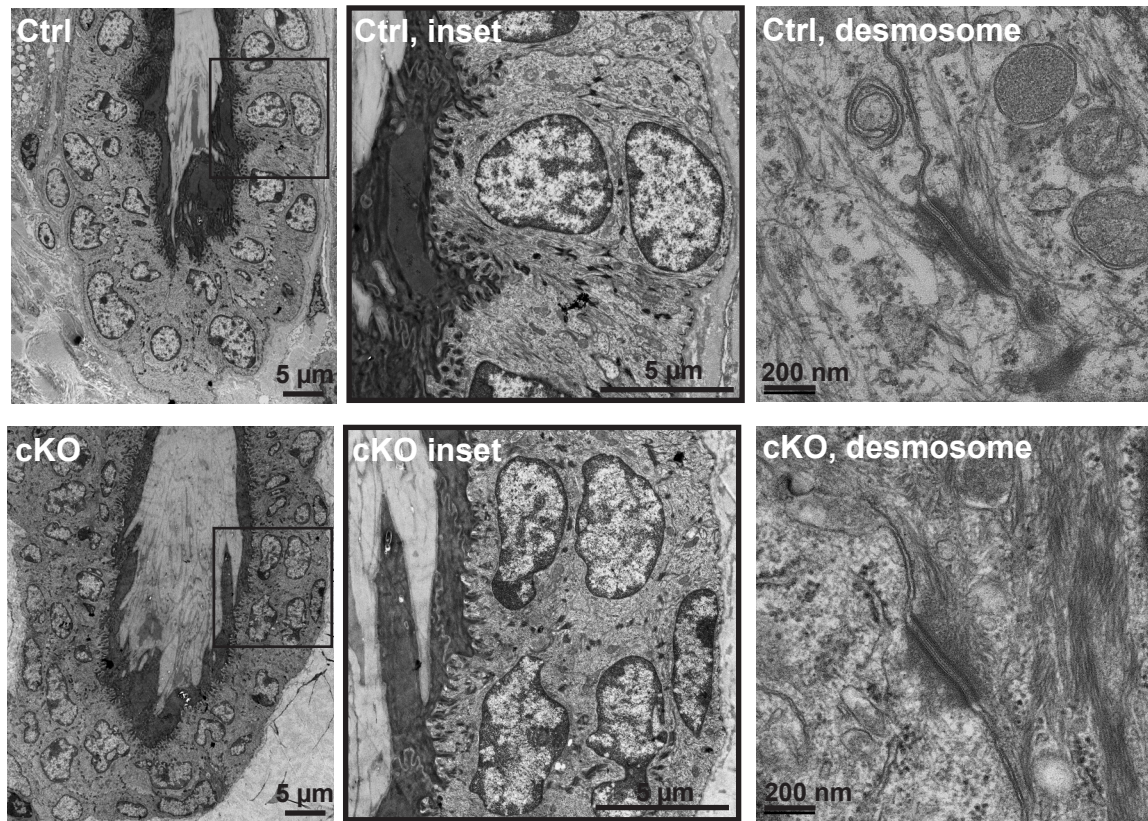

B

## Desmosomal Components

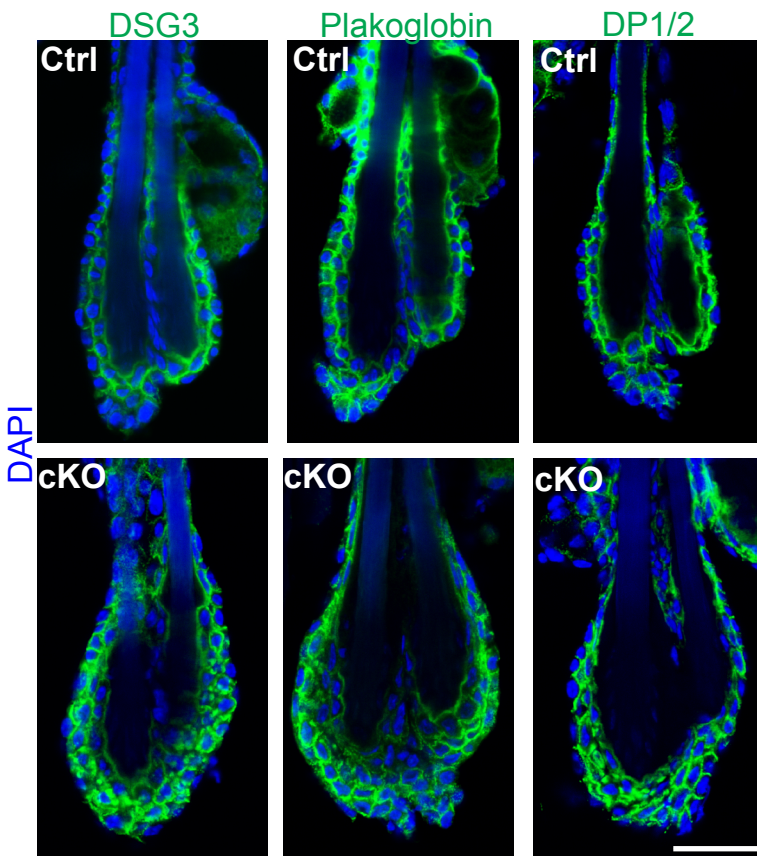

C

## Half-Desmosome Ultrastructure

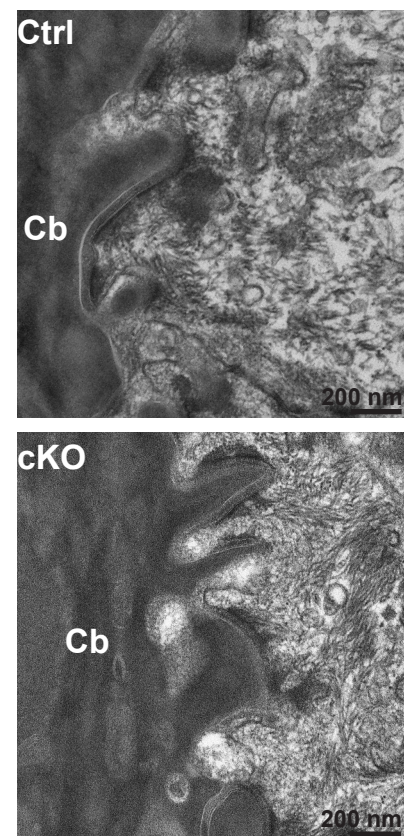

Supplement: supp [file elife_poa_e41661_Figure_1_figure_supplement_3.pdf › elife_poa_e41661_Figure_1_figure_supplement_3.pdf]

# Figure supplement 5

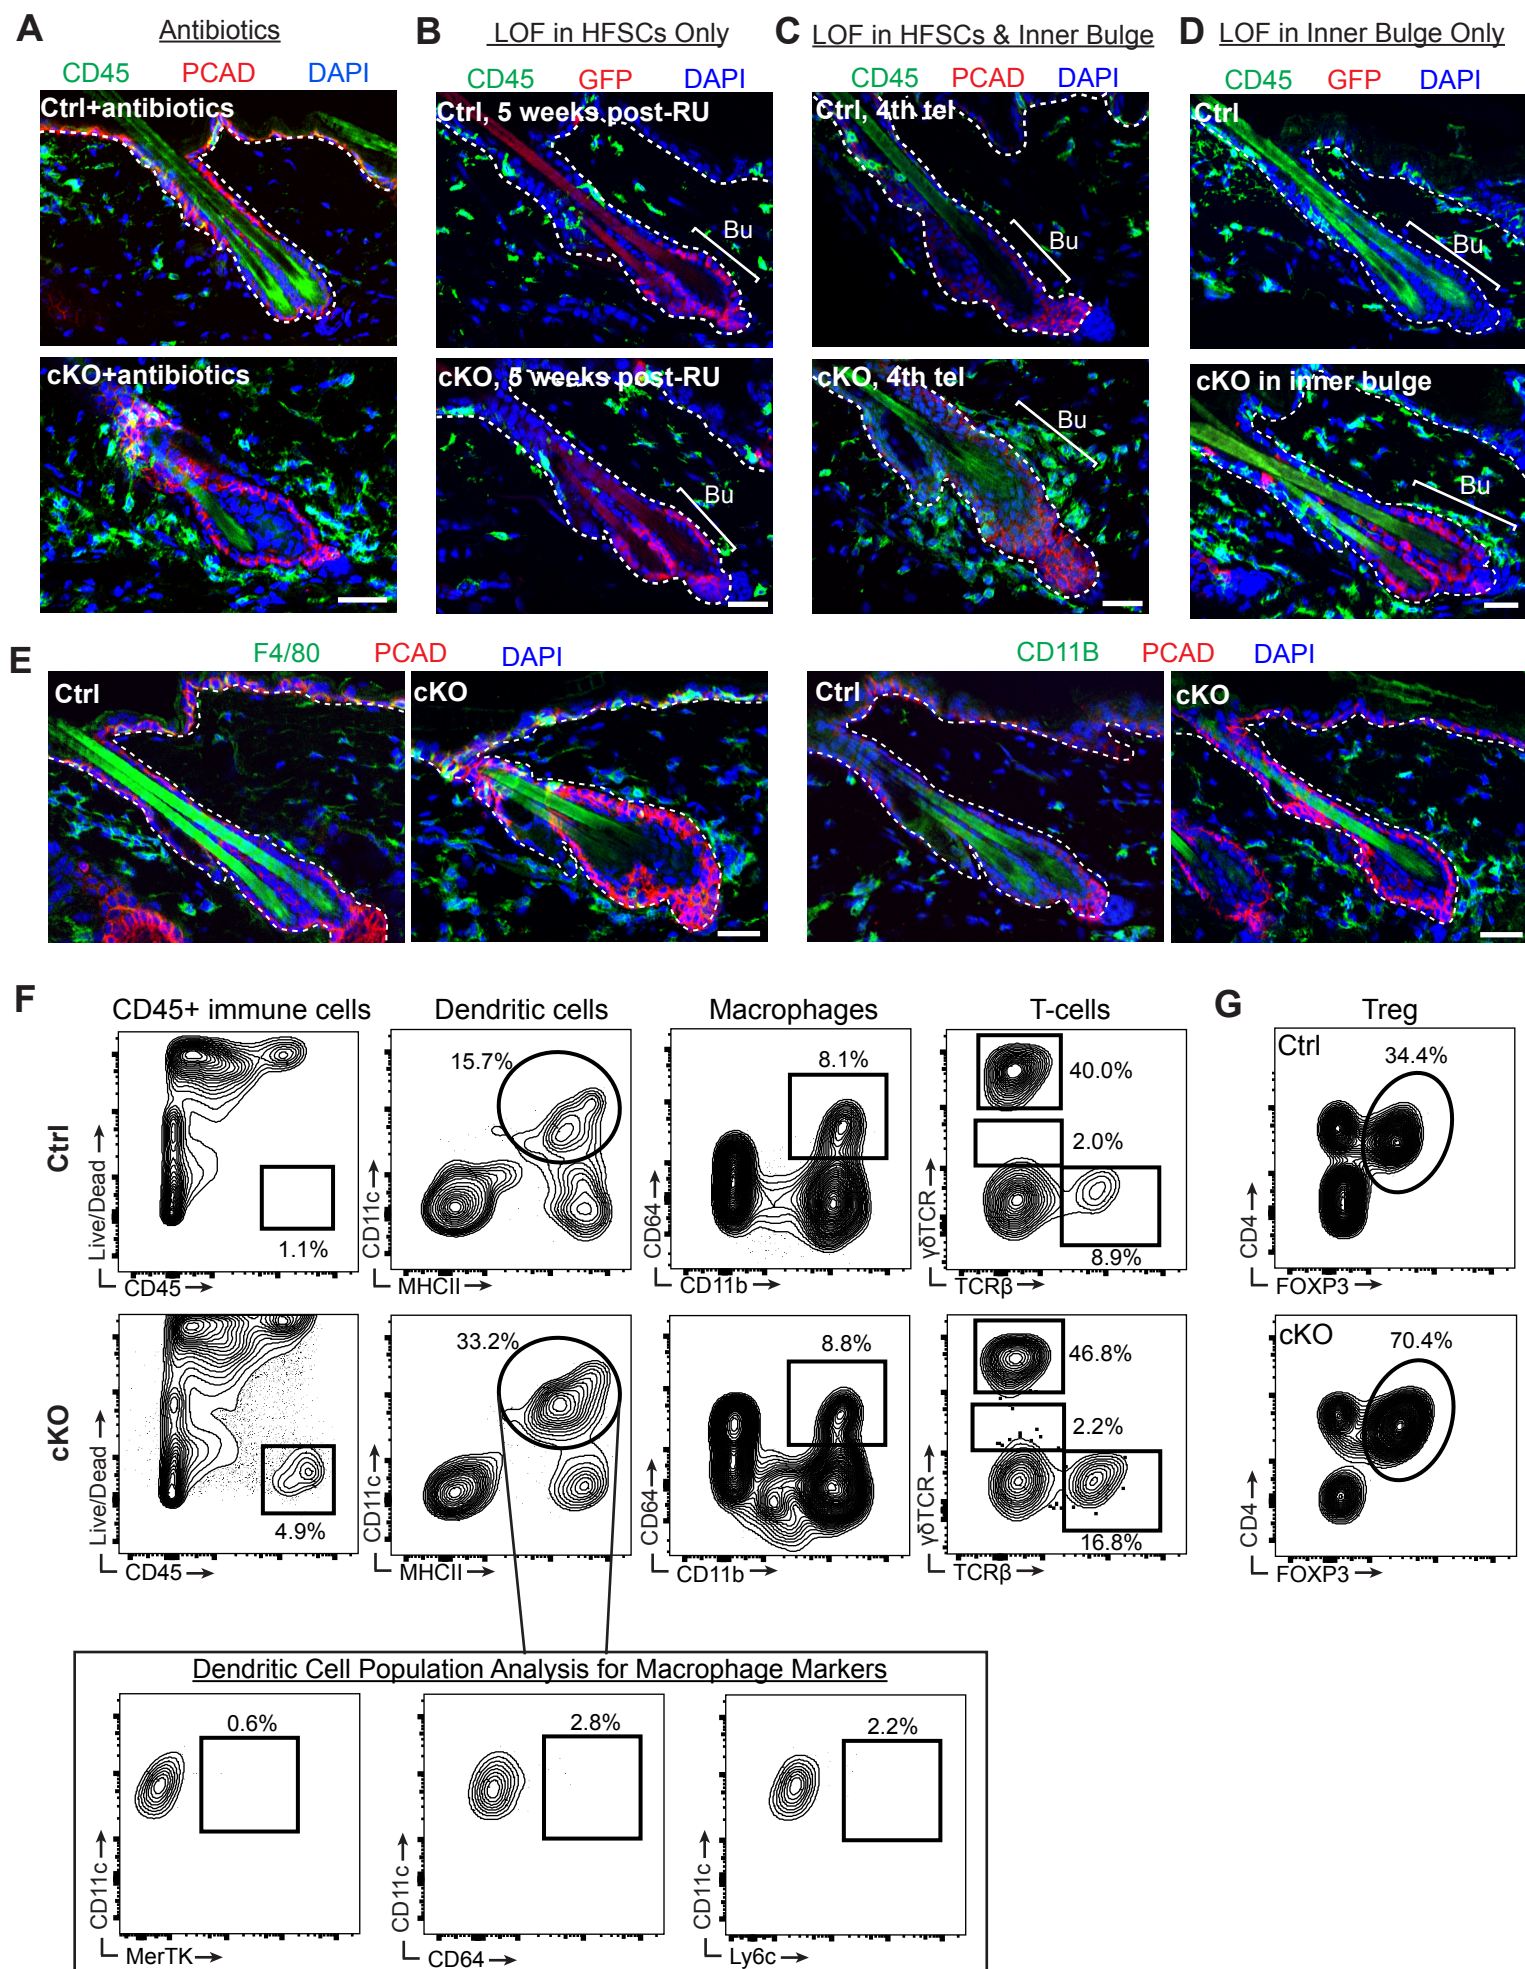

Supplement: supp [file elife_poa_e41661_Figure_4_figure_supplement_1.pdf › elife_poa_e41661_Figure_4_figure_supplement_1.pdf]

# Figure supplement 6

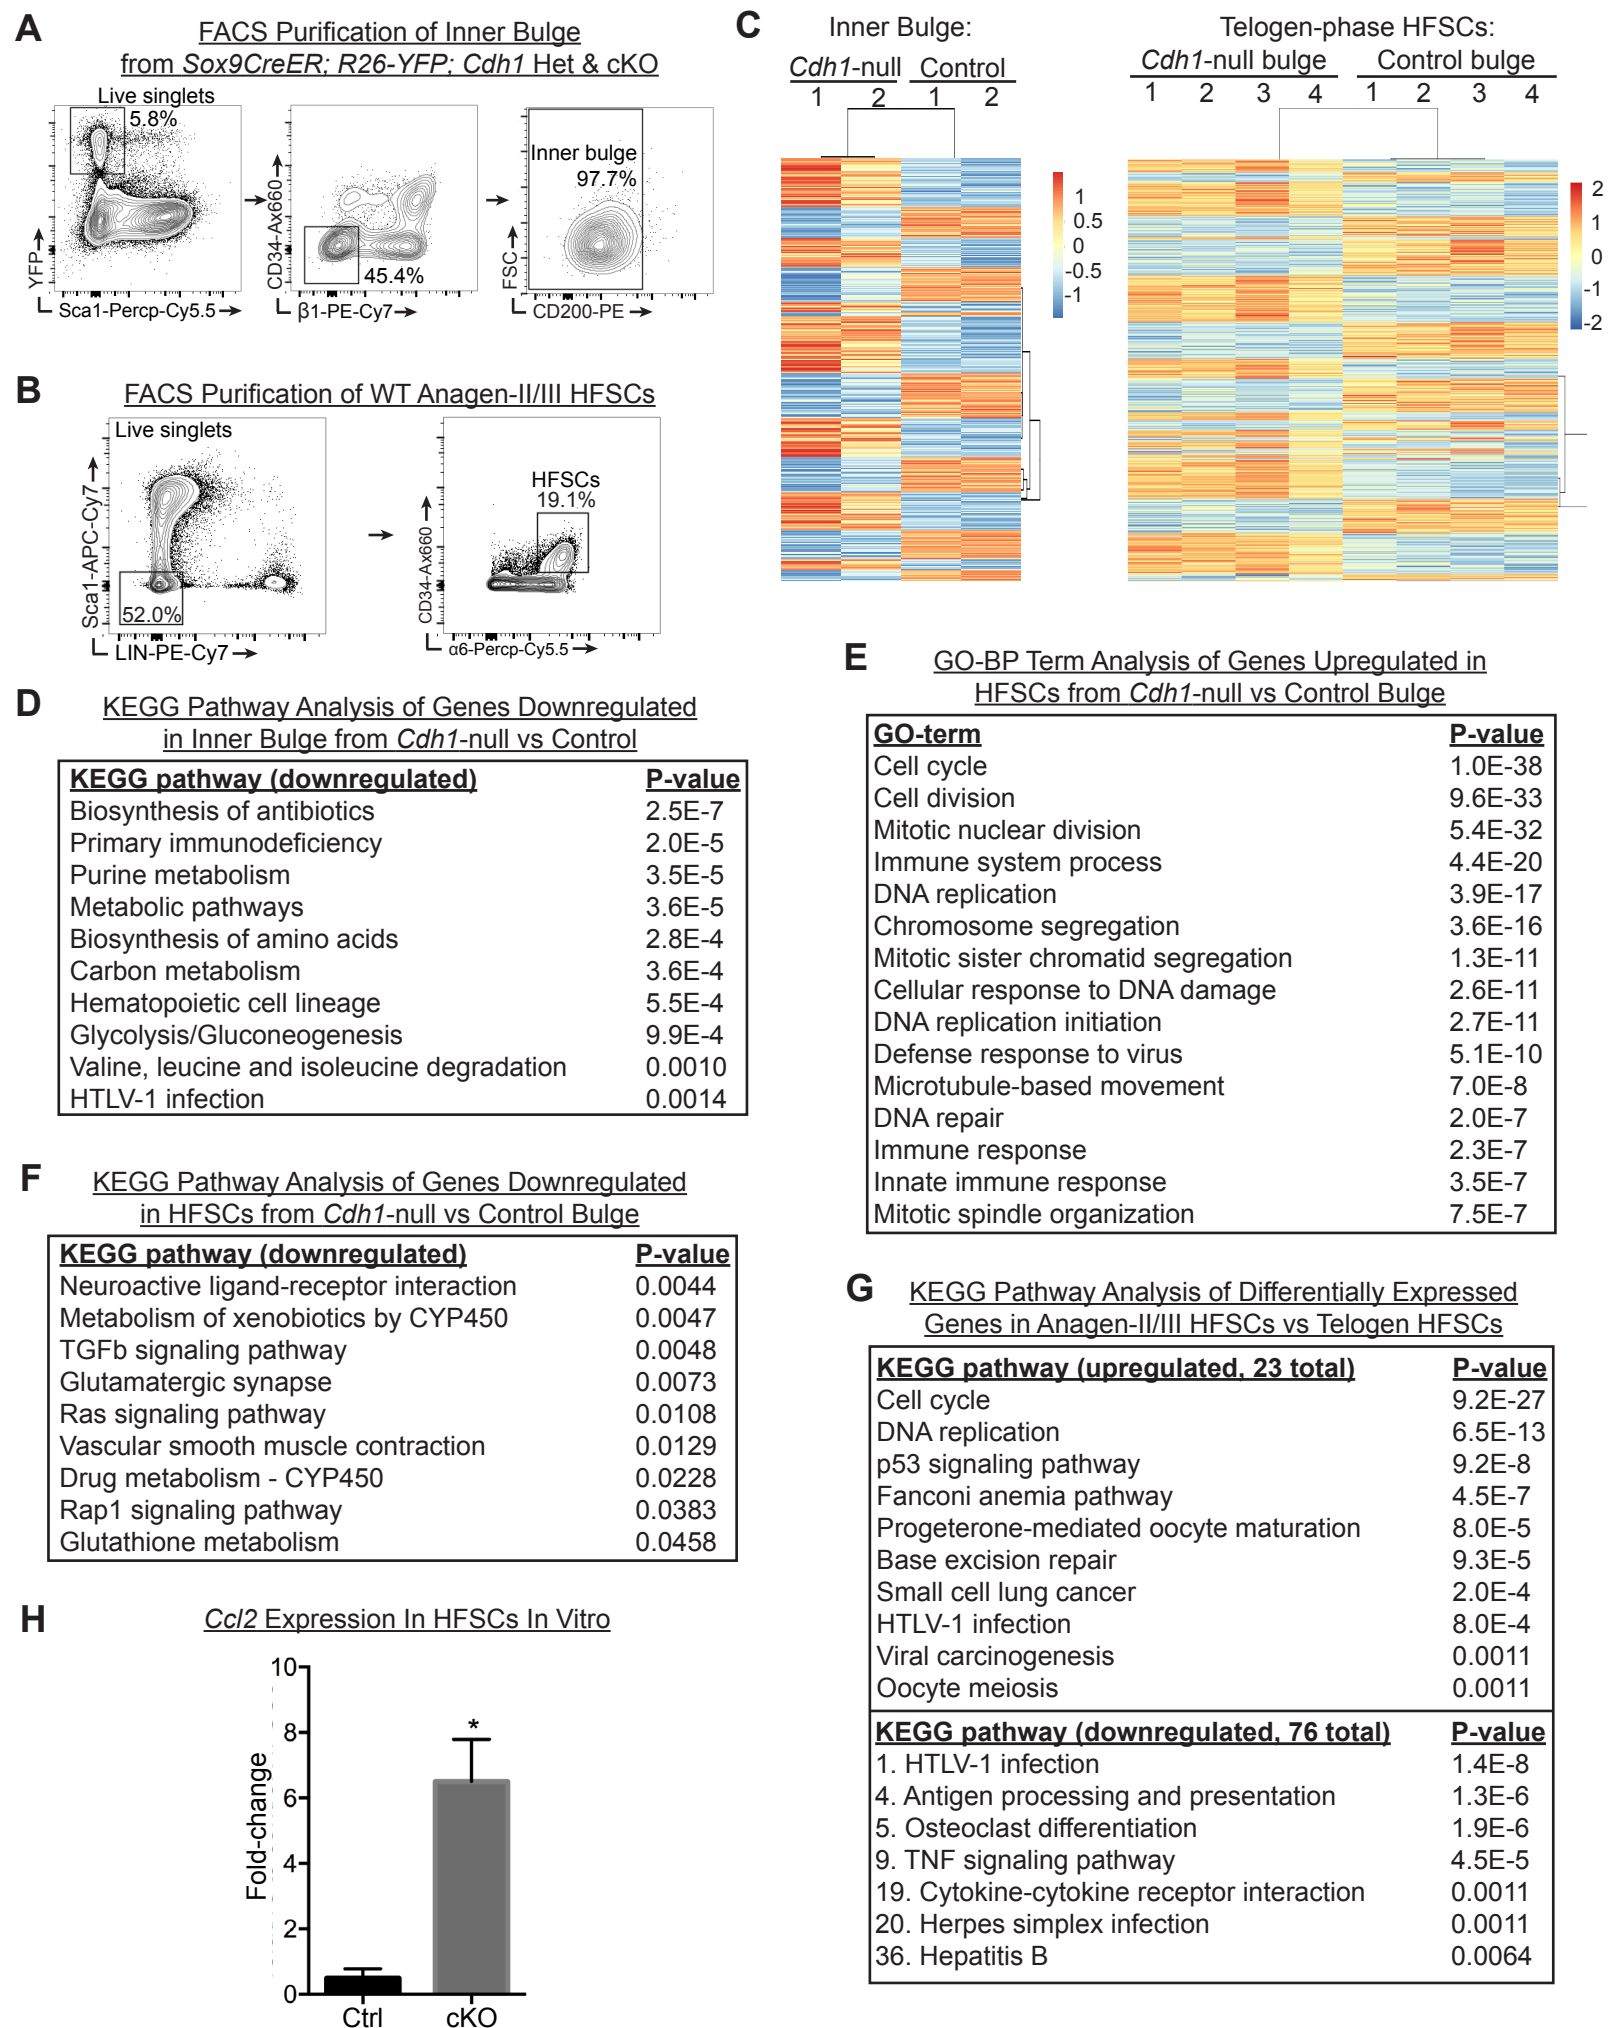

Supplement: supp [file elife_poa_e41661_Figure_5_figure_supplement_1.pdf › elife_poa_e41661_Figure_5_figure_supplement_1.pdf]
